# Supplementary material for: The Potential of Apulian Olive Biodiversity: The Case of Oliva Rossa Virgin Olive Oil
Source: PubMed Central journal article supplement (PMC7915085; doi:10.3390/foods10020369), 2021-02-09
Supplement: foods-10-00369-s001.pdf [file foods-10-00369-s001.pdf]

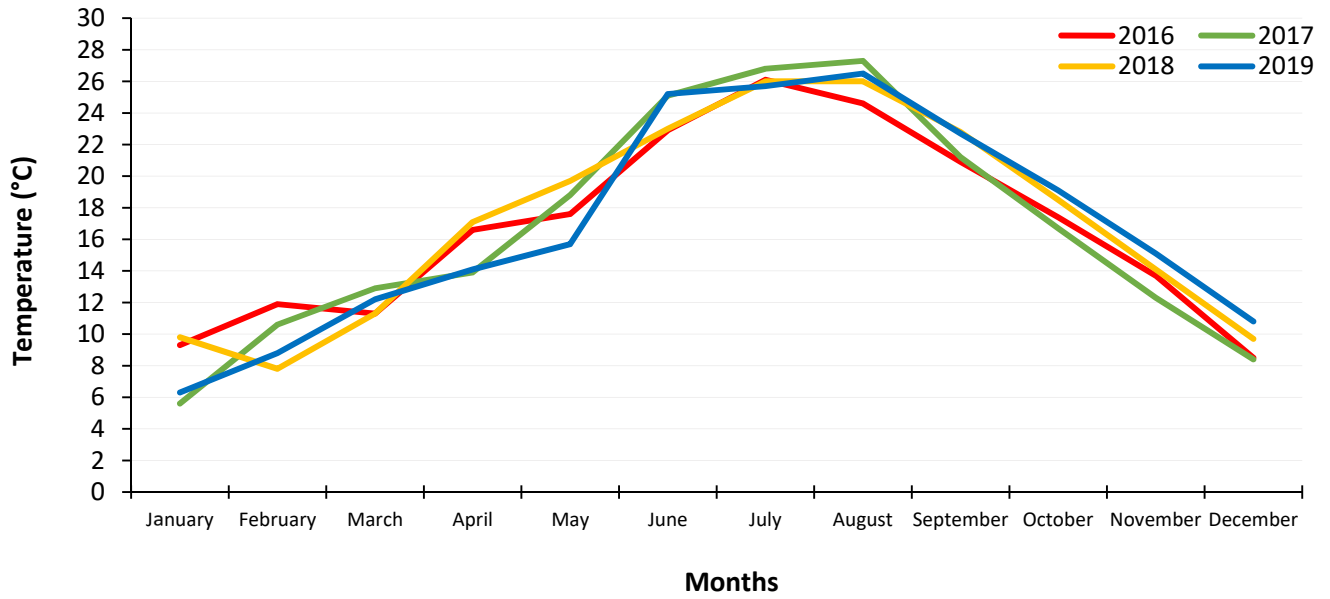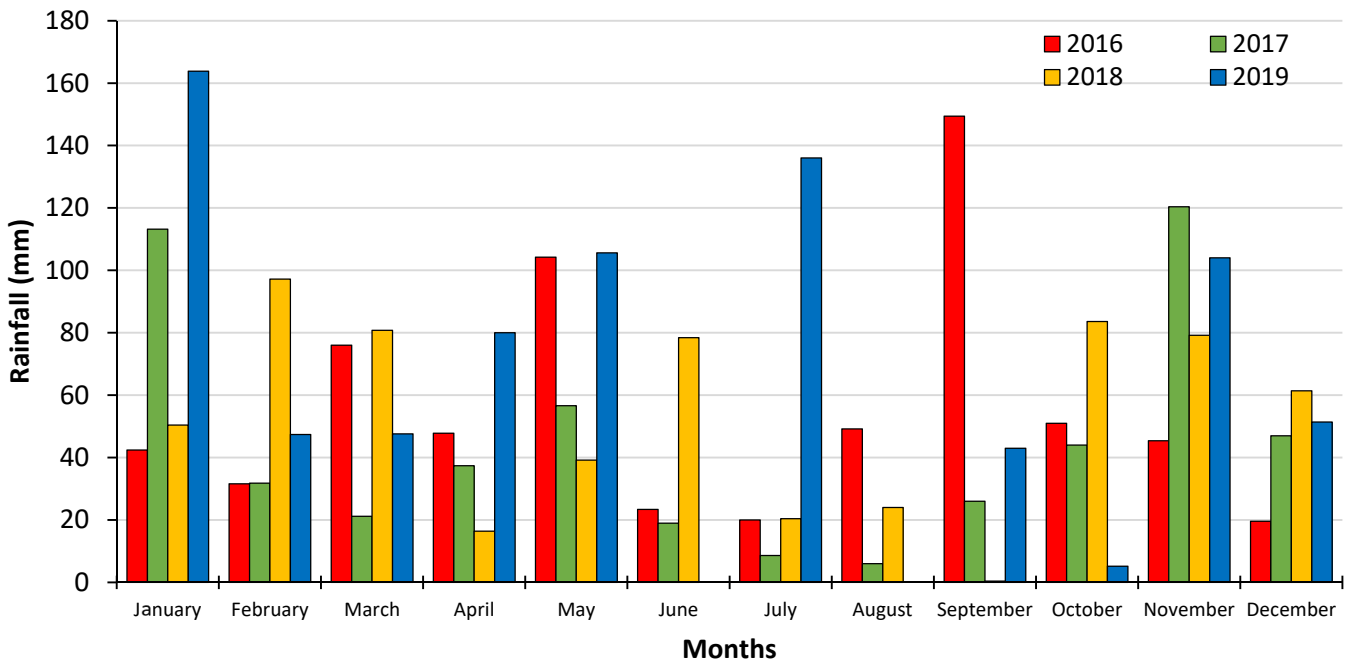

**Figure S1.** Monthly average temperature (°C) and rainfall (mm) recorded at the nearest weather station of Turi (Bari, Italy) for four years (2016–2019). The field including Oliva Rossa trees is about 8 km from the weather station.

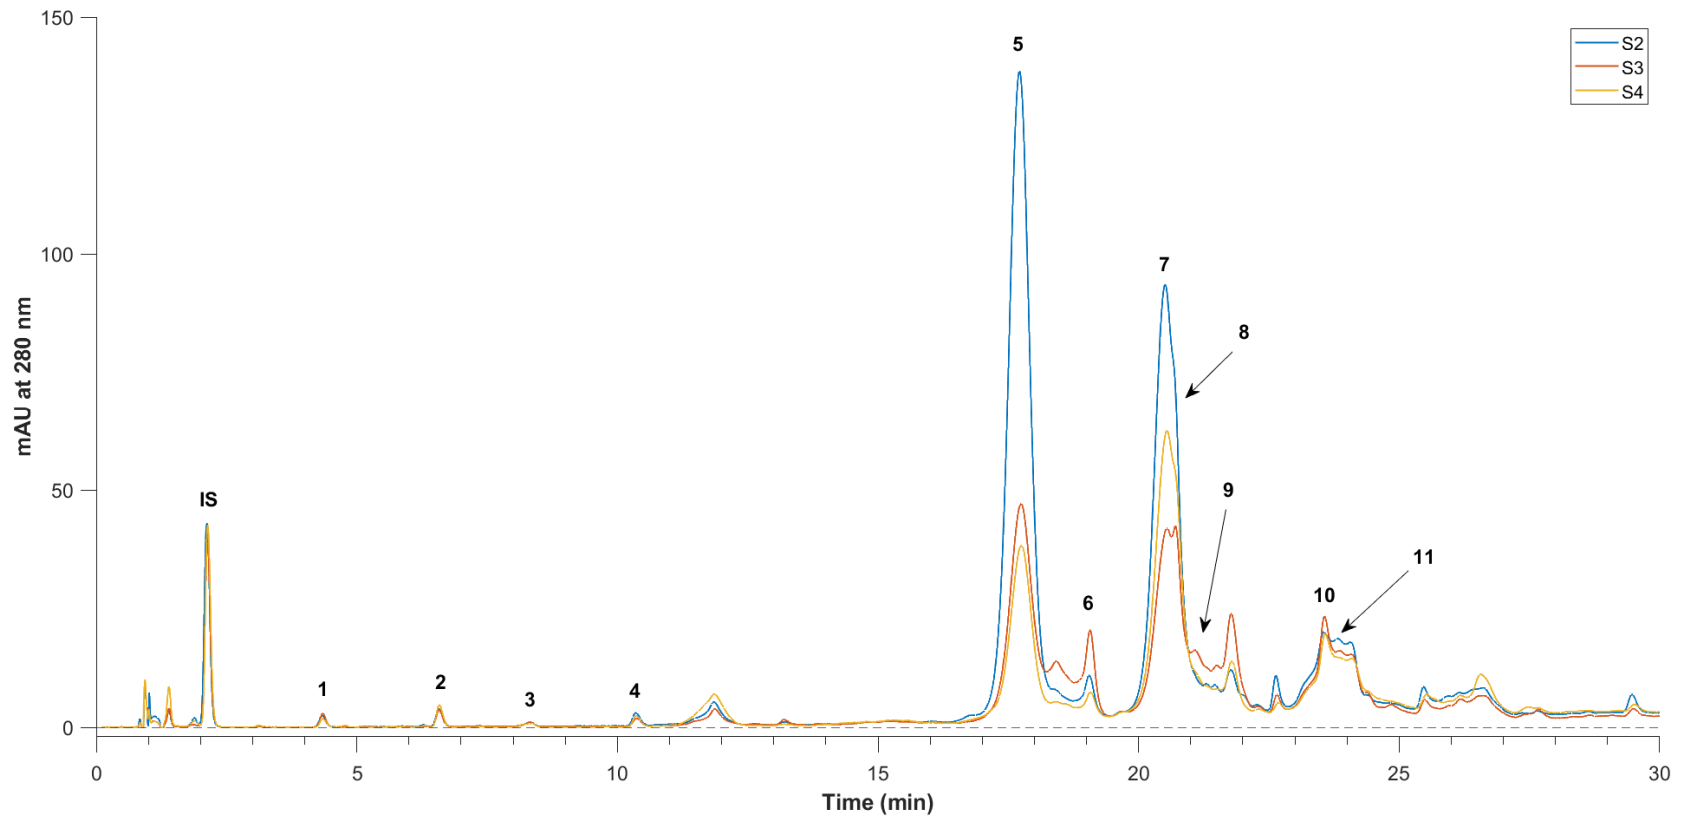

**Figure S2.** UHPLC-DAD phenolic profile of Oliva Rossa VOOs extracted at different sampling times in 2017/2018 harvest season. IS, internal standard; (1) 3,4-DHPEA; (2) *p*-HPEA; (3) Vanillic acid; (4) Syringic acid; (5) 3,4-DHPEA-EDA; (6) 3,4-DHPEA-EDA-CARB; (7) *p*-HPEA-EDA; (8) Pinoresinol; (9) Luteolin; (10) *p*-HPEA-EA; (11) Apigenin. S2–S4: three subsequent samplings.
